# Supplementary material for: Identify miRNA-mRNA regulation pairs to explore potential pathogenesis of lung adenocarcinoma
Source: publisher site journal article supplement (doi:10.18632/aging.204341), 2022-10-19
Supplement: Supplementary file [file aging-v14i20-204341-supplementary-material-SD1.pdf]

## SUPPLEMENTARY FIGURE

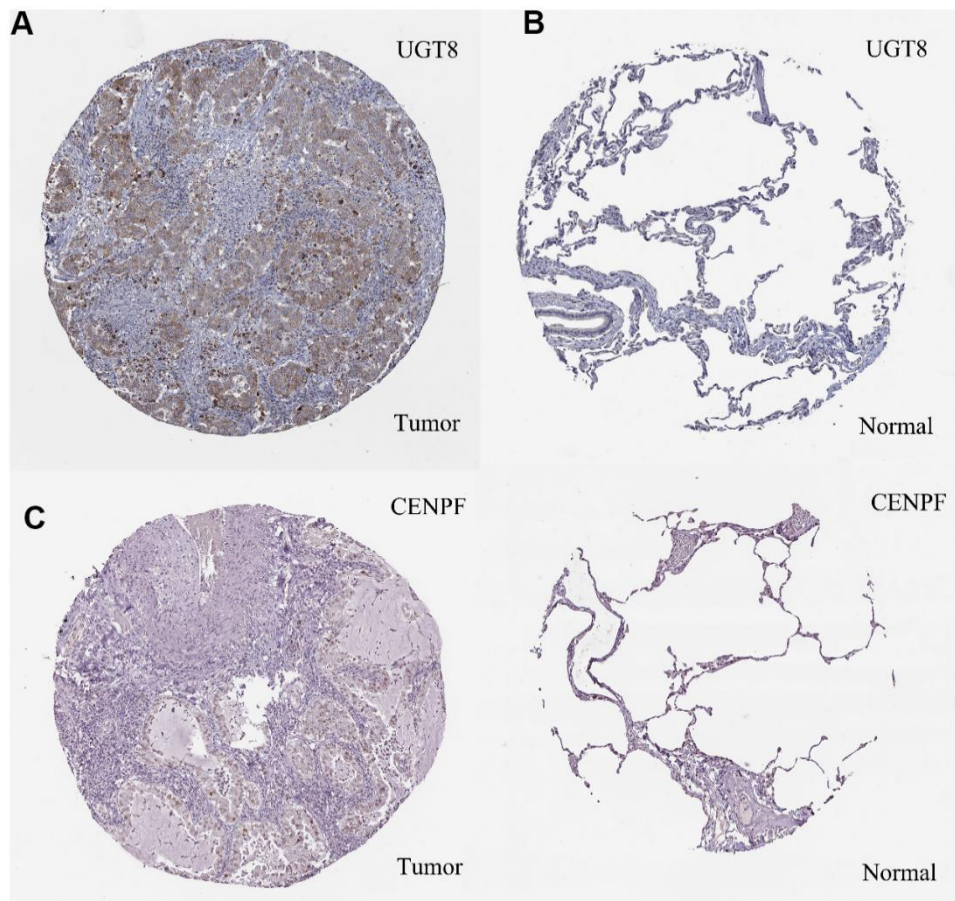

**Supplementary Figure 1. Immunohistochemistry images of UGT8 and CENPF in LUAD and normal lung tissue from HPA database. (A)** Medium immunostaining of UGT8 in LUAD cells (antibody HPA065785); **(B)** Immunostaining of UGT8 was not detected in normal lung tissue cells (antibody HPA065785); **(C)** Medium immunostaining of CENPF in LUAD cells (antibody CAB070134); **(D)** Immunostaining of CENPF was not detected in normal lung tissue cells (antibody CAB070134).
