# Supplementary material for: Identify miRNA-mRNA regulation pairs to explore potential pathogenesis of lung adenocarcinoma
Source: publisher site journal article supplement (doi:10.18632/aging.204341), 2022-10-19
Supplement: Supplementary file [file aging-v14i20-204341-supplementary-material-SD2.pdf]

## SUPPLEMENTARY TABLES

**Supplementary Table 1. The sequences of primers for candidate miRNAs and targeted mRNAs.**

|                       | Name            | Forward primer sequences (5'→3') | Reverse primer sequences (5'→3') |
|-----------------------|-----------------|----------------------------------|----------------------------------|
| <b>miRNA mature</b>   | hsa-miR-1-3p    | TGGAATGTAAAGAAGTATGT             | universal reverse primer         |
|                       | hsa-miR-9-5p    | TCTTTGGTTATCTAGCTGTAT            | universal reverse primer         |
|                       | hsa-miR-126-5p  | CATTATTACTTTTGGTACG              | universal reverse primer         |
|                       | hsa-miR-135b-5p | TATGGCTTTTCATTCCCTATGT           | universal reverse primer         |
|                       | hsa-miR-196a-5p | TAGGTAGTTTCATGTTGTT              | universal reverse primer         |
| <b>mRNA</b>           | BMPR2           | CACTCAGTCCACCTCATTCAAT           | TTGTTTACGGTCTCCTGTCAAC           |
|                       | STARD13         | CGAGGAGACAGAAATGGGTCA            | TCCACTGCTTTCGCTGTGAAT            |
|                       | UGT8            | AGAGACATCGCCCCATCTAAT            | TCAAACAGTTTCGATTGCTGTCA          |
|                       | CENPF           | ACCTTCACAACGTGTTAGACAG           | CTGAGGCTCTCATATTCGGCA            |
|                       | ITGB4           | GCAGCTTCCAAATCACAGAGG            | CCAGATCATCGGACATGGAGTT           |
| <b>Reference gene</b> | RUN6B           | CGATAAAATTGGAACGATACAGA          | ATTTGGACCATTTCTCGATTTGT          |
|                       | GAPDH           | ACAACCTTTGGTATCGTGGAAAGG         | GCCATCACGCCACAGTTTC              |

**Supplementary Table 2. Immune cells differentiated between tumor tissue and normal tissue in TCGA-LUAD.**

| Cell type                    | Tumor  | Normal | logFC  | P Value    |
|------------------------------|--------|--------|--------|------------|
| T cells regulatory (Tregs)   | 0.0317 | 0.0028 | 3.489  | 3.1655E-22 |
| NK cells resting             | 0.0066 | 0.0382 | -2.532 | 7.9002E-22 |
| Monocytes                    | 0.0164 | 0.0564 | -1.784 | 2.0356E-21 |
| Plasma cells                 | 0.0926 | 0.0108 | 3.101  | 3.0347E-21 |
| Eosinophils                  | 0.0017 | 0.0118 | -2.839 | 2.1925E-18 |
| T cells follicular helper    | 0.0248 | 0.0041 | 2.586  | 7.0704E-16 |
| Neutrophils                  | 0.0084 | 0.0278 | -1.732 | 1.0869E-12 |
| Macrophages M1               | 0.0662 | 0.0326 | 1.023  | 1.0209E-09 |
| Mast cells resting           | 0.0545 | 0.0831 | -0.610 | 1.7838E-08 |
| T cells CD4 memory resting   | 0.1567 | 0.2052 | -0.389 | 1.9722E-06 |
| Macrophages M2               | 0.1520 | 0.1926 | -0.341 | 2.0297E-06 |
| T cells CD4 memory activated | 0.0229 | 0.0038 | 2.576  | 4.3641E-06 |
| Dendritic cells resting      | 0.0544 | 0.0206 | 1.400  | 4.3387E-05 |
| T cells CD4 naive            | 0.0000 | 0.0000 | /      | 2.7512E-03 |
| B cells memory               | 0.0086 | 0.0026 | 1.748  | 3.4089E-03 |
| Dendritic cells activated    | 0.0222 | 0.0299 | -0.430 | 3.6920E-03 |
| Macrophages M0               | 0.1431 | 0.1695 | -0.245 | 6.9230E-03 |
| T cells gamma delta          | 0.0044 | 0.0005 | 3.038  | 7.8111E-03 |
| B cells naive                | 0.0243 | 0.0158 | 0.616  | 1.0380E-02 |

FC, Fold change.
